# Supplementary material for: Genetic mutation and tumor microbiota determine heterogenicity of tumor immune signature: Evidence from gastric and colorectal synchronous cancers
Source: PubMed Central journal article supplement (PMC9676241; doi:10.3389/fimmu.2022.947080), 2022-11-07
Supplement: DataSheet_1.pdf [file DataSheet_1.pdf]

# List of antibodies

| Antibodies      | Source                    | Identifier       |
|-----------------|---------------------------|------------------|
| CD3             | Cell signaling technology | Cat#: 85061s     |
| CD11b           | abcam                     | Cat#: ab13357    |
| Pan cytokeratin | biolegend                 | Cat#: 914704     |
| CD68            | biolegend                 | Cat#: 916104     |
| CD138           | invitrogen                | Cat#: 362900     |
| CD4             | abcam                     | Cat#: ab133616   |
| CD8             | biolegend                 | Cat#: 372902     |
| CD69            | abcam                     | Cat#: ab234511   |
| Foxp3           | Cell signaling technology | Cat#: 12653s     |
| Ki67            | BD                        | Cat#: 556609     |
| GAMMADELTA      | Novus Biologicals         | Cat#: NBP2-62225 |
