# Supplementary material for: Genetic mutation and tumor microbiota determine heterogenicity of tumor immune signature: Evidence from gastric and colorectal synchronous cancers
Source: PubMed Central journal article supplement (PMC9676241; doi:10.3389/fimmu.2022.947080), 2022-11-07
Supplement: DataSheet_2.pdf [file DataSheet_2.pdf]

# The top 20 feature genes of epithelial subsets

| cluster | gene       |
|---------|------------|
| 1       | 0 RPS21    |
| 2       | 0 TARS     |
| 3       | 0 RPL7     |
| 4       | 0 SMC2     |
| 5       | 0 HJURP    |
| 6       | 0 RPL12    |
| 7       | 0 GNG4     |
| 8       | 0 LGALS3   |
| 9       | 0 ALDOC    |
| 10      | 0 COX6C    |
| 11      | 0 PTTG1    |
| 12      | 0 IGHG1    |
| 13      | 0 CEACAM7  |
| 14      | 0 PAICS    |
| 15      | 0 UBE2C    |
| 16      | 0 PRELID3B |
| 17      | 0 RAN      |
| 18      | 0 TMEM45B  |
| 19      | 0 PPBP     |
| 20      | 0 SELENBP1 |
| 21      | 1 ERBB3    |
| 22      | 1 APP      |
| 23      | 1 CLDN1    |
| 24      | 1 CAMK2N1  |
| 25      | 1 CCT3     |
| 26      | 1 CEACAM6  |
| 27      | 1 CD24     |
| 28      | 1 SLC11A2  |
| 29      | 1 CEACAM5  |
| 30      | 1 ATP1B1   |
| 31      | 1 CES2     |
| 32      | 1 SCD      |
| 33      | 1 CLDN4    |
| 34      | 1 GPX2     |
| 35      | 1 H1FO     |
| 36      | 1 ALDOB    |
| 37      | 1 SLC12A2  |
| 38      | 1 LCN2     |
| 39      | 1 LYZ      |
| 40      | 1 DMBT1    |
| 41      | 2 ACTA2    |
| 42      | 2 TAGLN    |
| 43      | 2 CALD1    |
| 44      | 2 HSPA1A   |

|    |            |
|----|------------|
| 45 | 2 MUC4     |
| 46 | 2 GBP5     |
| 47 | 2 PGC      |
| 48 | 2 FOSB     |
| 49 | 2 NR4A1    |
| 50 | 2 JCHAIN   |
| 51 | 2 RGS2     |
| 52 | 2 IGHA2    |
| 53 | 2 CXCR4    |
| 54 | 2 SRGN     |
| 55 | 2 HSPA1B   |
| 56 | 2 DNAJB1   |
| 57 | 2 PPP1R15A |
| 58 | 2 TIMP2    |
| 59 | 2 LIPF     |
| 60 | 2 ITGAX    |
